# Supplementary material
Source: publisher site journal article supplement (https://www.degruyterbrill.com/publication/isbn/9783486719031/downloadAsset/9783486719031_Buchinformation.pdf)
Supplement: Supplementary file 1 [file 9783486719031_Buchinformation.pdf]

## Eine kompakte Einführung

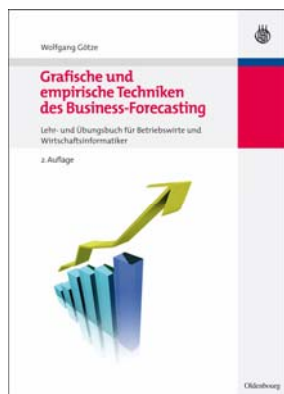

Wolfgang Götze

### Grafische und empirische Techniken des Business-Forecasting

Lehr- und Übungsbuch für Betriebswirte und  
Wirtschaftsinformatiker

2., korrigierte Auflage 2010

X, 239 Seiten I Broschur I 49,80 €

ISBN 978-3-486-59763-9

Wer die richtigen Lehren aus der Vergangenheit gezogen hat, dem wird vor der Zukunft nicht bange sein. Dieser Erkenntnis folgt die in diesem Werk entwickelte vorhersageorientierte Modellierungstechnik.

Das Buch macht zunächst die wesentlichen Aspekte der Vergangenheitsentwicklung mit Hilfe von Zeitreihenmodellen transparent, um damit anschließend Prognose-Experimente am aktuellen Rand der Zeitreihe durchzuführen. Ausgewählt wird am Ende ein adäquates Modell optimaler Kompliziertheit mit überlegenen Prognoseeigenschaften.

Der Leser kann den mehrstufigen Entstehungsprozess von Punkt- und Intervallprognosen schrittweise nachvollziehen und gegebenenfalls korrigierend eingreifen.

Der praktisch wichtige Bereich der Kurzfristprognosen legt großen Wert auf einfach strukturierte Modelle mit niedrigem Korrekturaufwand und hoher Flexibilität.

---

Das Lehrbuch führt Studierende der Bachelor- und Masterstudiengänge sowie Praktiker in grundlegende und weit verbreitete Ansätze der Analyse und Prognose ein.

---

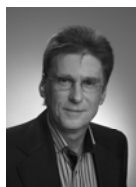

Prof. Dr. Wolfgang Götze lehrt Statistik und Operations Research an der Fachhochschule Stralsund.

[www.oldenbourg.de](http://www.oldenbourg.de)

**Pressereferat Wirtschafts- und Sozialwissenschaften**

Oldenbourg Wissenschaftsverlag I Rosenheimer Str. 145 I 81671 München

Tel.: +49 89 45051-468 I Fax: +49 89 45051-292 I [presse-wiso@oldenbourg.de](mailto:presse-wiso@oldenbourg.de)

Alle Veröffentlichungen des Oldenbourg Verlags sind über den Buchhandel zu beziehen.

Rezensionsexemplare auf Anforderung.
